# Supplementary material for: Evaluation of the Mycobactericidal Effect of Thio-functionalized Carbohydrate Derivatives
Source: PubMed Central journal article supplement (PMC6154314; doi:10.3390/molecules22050812), 2017-05-16

## **Supplementary Materials**

Evaluation of the bactericidal effect of thio-functionalized carbohydrate derivatives.

Małgorzata Korycka-Machała<sup>1</sup>, Anna Brzostek<sup>1</sup>, Bożena Dziadek<sup>2</sup>, Malwina Kawka<sup>2</sup>, Tomasz Popławski<sup>3</sup>, Zbigniew J. Witczak<sup>4#</sup> and Jarosław Dziadek<sup>1#</sup>

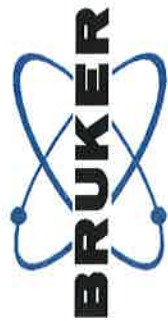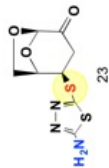

AM\_reaction23\_22Mar17

NAME  
EXPNO 10  
PROCNO 1  
Date\_ 20170322  
Time\_ 11.43  
INSTRUM spect  
PROBHD 5 mm PABBO BB-  
PULPROG zg30  
TD 65536  
SOLVENT CDCl3  
NS 64  
DS 2  
SWH 8223.685 Hz  
FIDRES 0.125483 Hz  
AQ 3.9846387 sec  
RG 203  
DW 60.800 usec  
DE 6.50 usec  
TE 293.7 K  
D1 1.00000000 sec  
TD0 1

=====  
CHANNEL f1  
NUC1 1H  
P1 14.50 usec  
PL -1.50 dB  
PL1W 12.52491283 W  
SFO1 400.1324710 MHz  
SI 32768  
SF 400.1300062 MHz  
WDW EM  
SSB 0  
LB 0  
GB 0  
PC 1.00

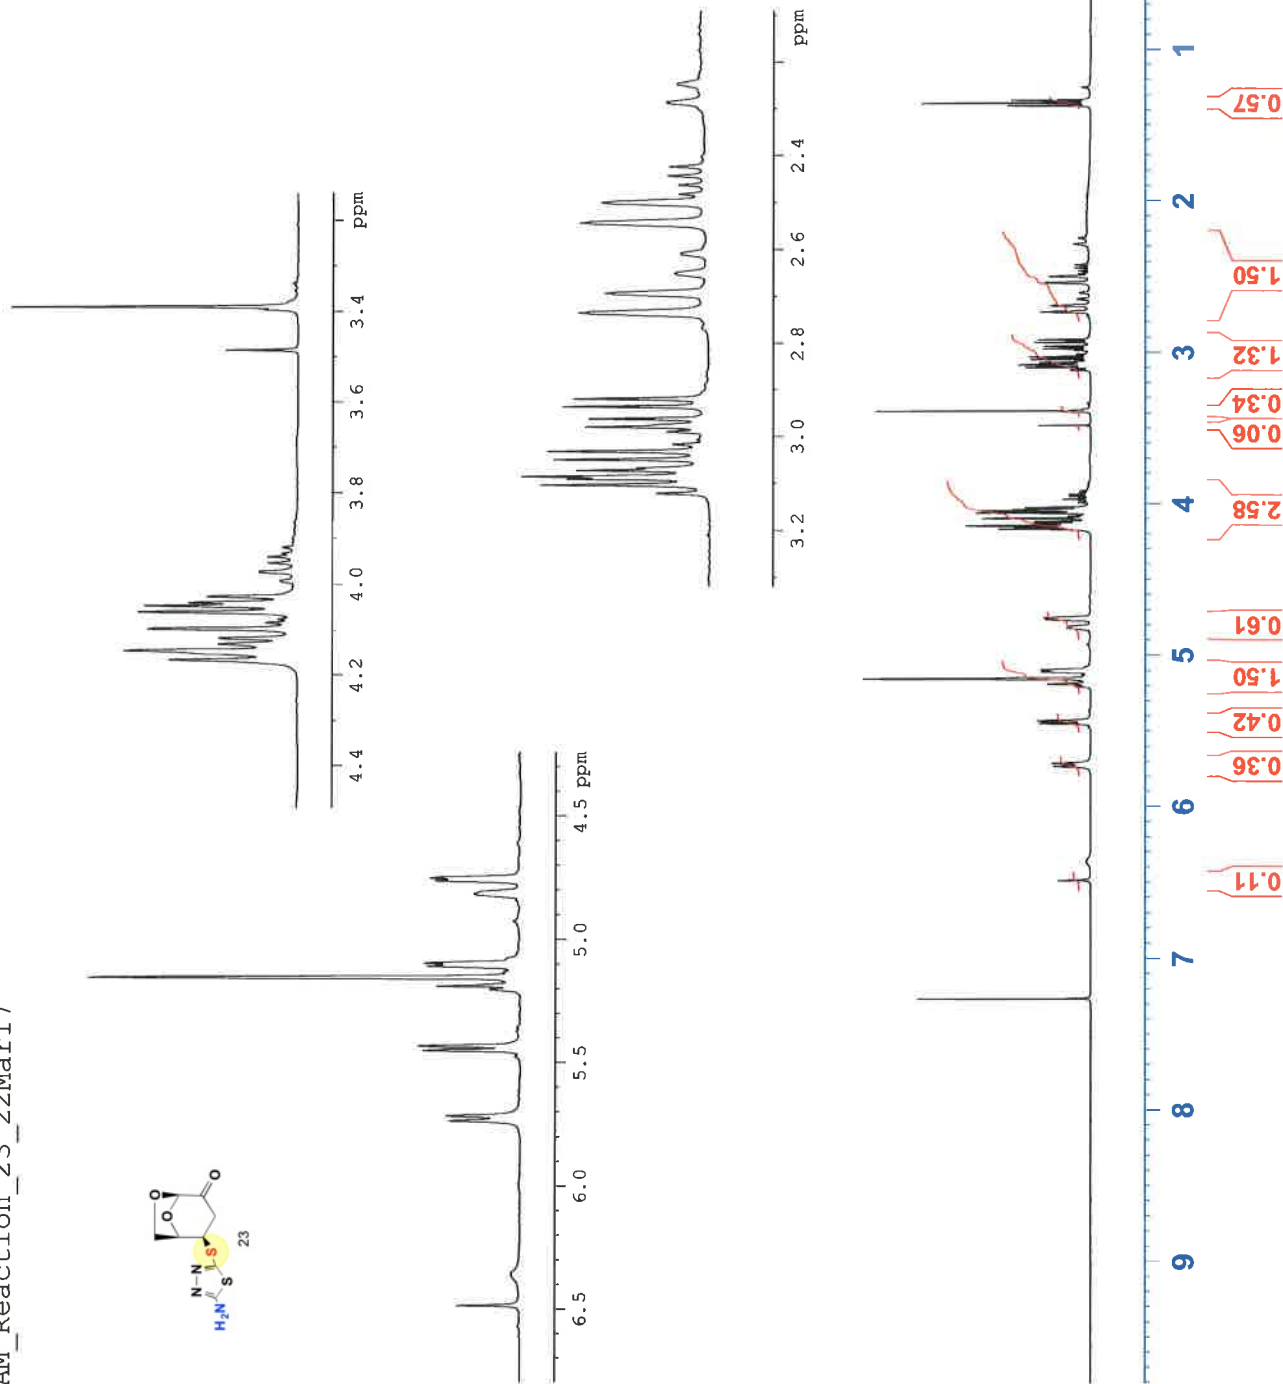

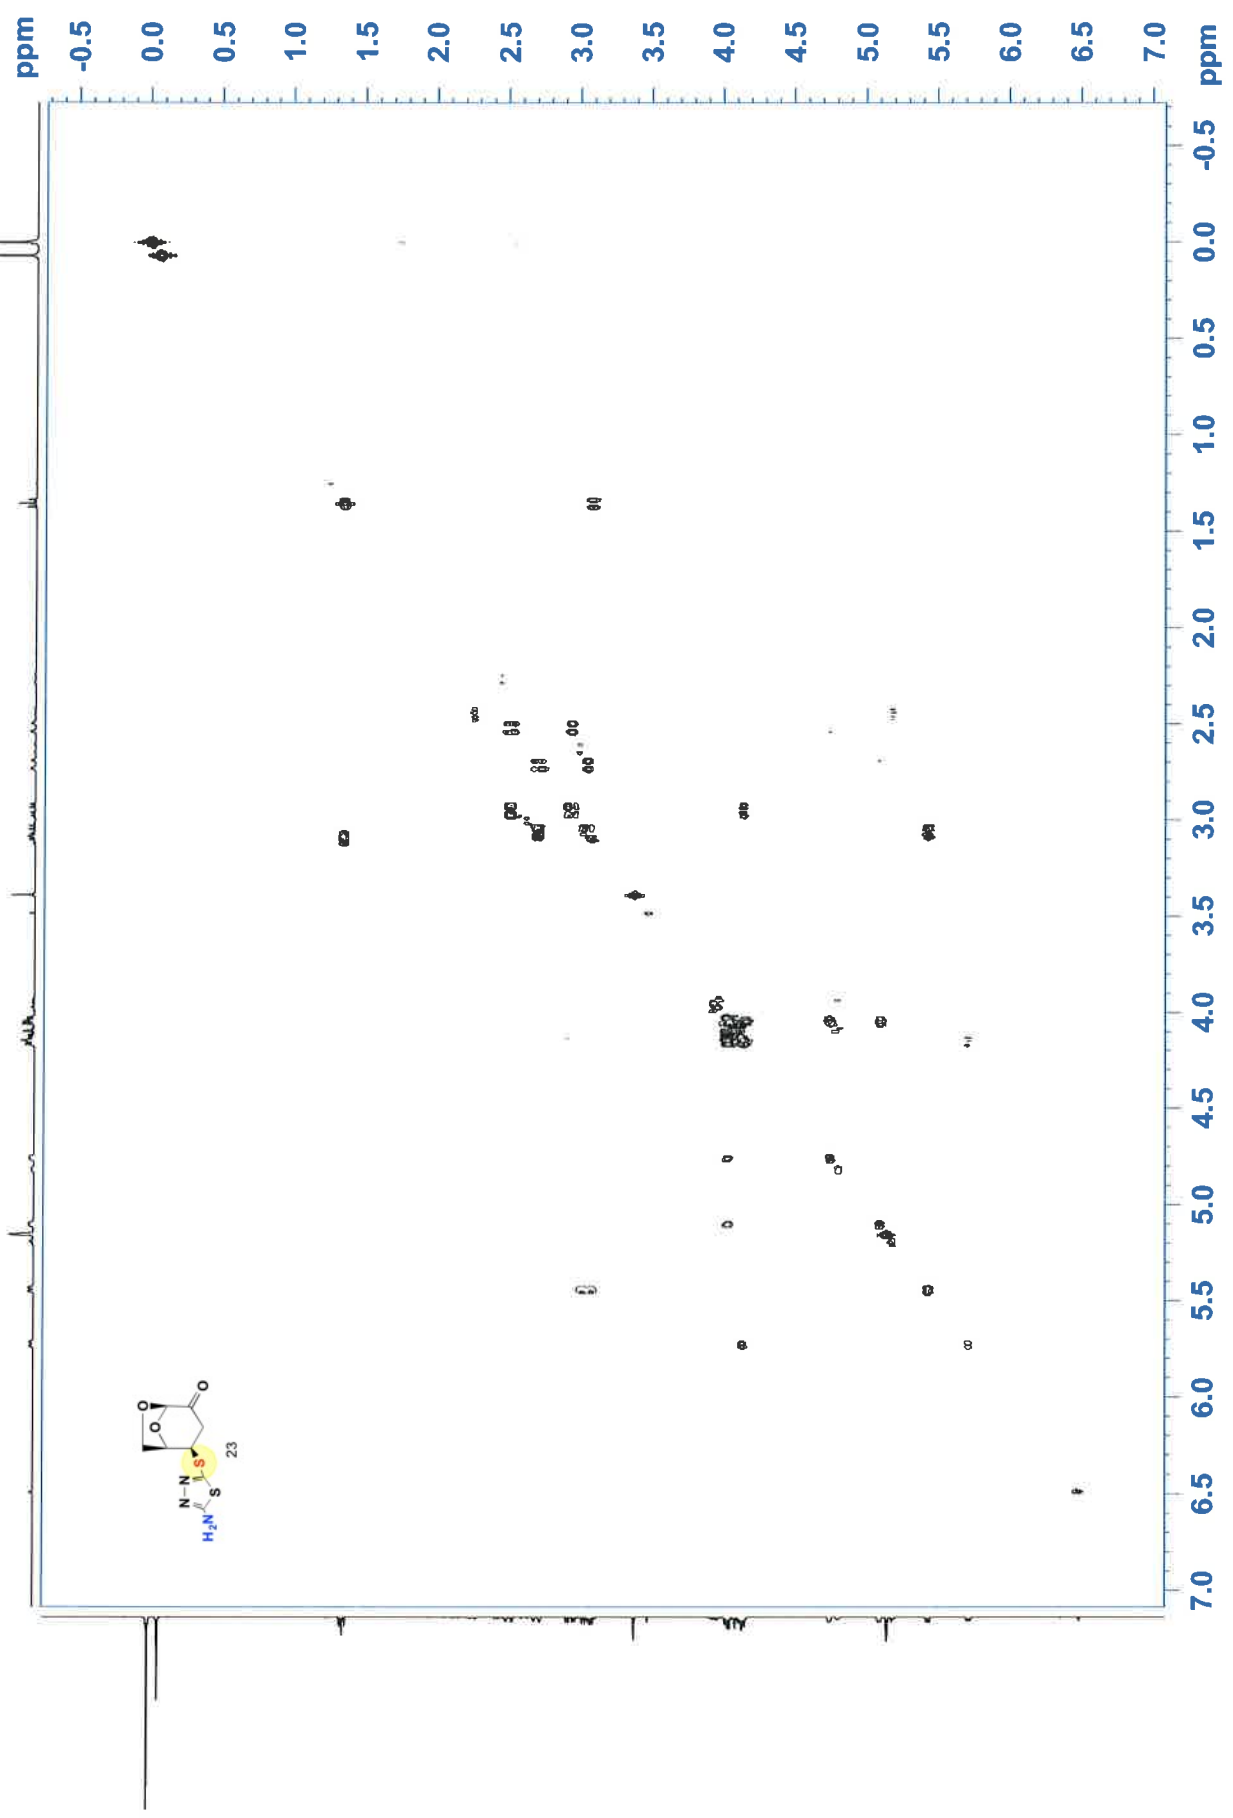

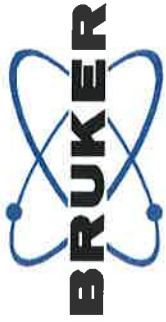

NAME AM\_reaction23\_22Mar17

EXPNO 1  
 PROCNO 1  
 Date\_ 20170322  
 Time 12.04  
 INSTRUM spect  
 PROBH 5 mm PABBO BB-  
 PULPROG zgpg30  
 TD 65536  
 SOLVENT CDCl3  
 NS 256  
 DS 4  
 SWH 24038.461 Hz  
 FIDRES 0.366798 Hz  
 AQ 1.3631988 sec  
 RG 203  
 DW 20.800 usec  
 DE 6.50 usec  
 TE 295.6 K  
 D1 2.00000000 sec  
 D11 0.03000000 sec  
 TD0 1

==== CHANNEL f1 =====  
 NUC1 13C  
 P1 9.80 usec  
 PL1 -3.00 dB  
 PL1W 66.65790558 W  
 SFO1 100.6228298 MHz

==== CHANNEL f2 =====  
 CPDPRG2 waitz16  
 NUC2 1H  
 PCPD2 80.00 usec  
 PL2 -1.50 dB  
 PL12 13.33 dB  
 PL13 13.00 dB  
 PL2W 12.52491283 W  
 PL12W 0.41188380 W  
 PL13W 0.44440067 W  
 SFO2 400.1316005 MHz  
 SI 32768  
 SF 100.6127690 MHz  
 WDW no  
 SSB 0  
 LB 0.00 Hz  
 GB 0  
 PC 1.40

198.97  
 197.48  
 155.38  
 101.97  
 101.43  
 92.41  
 74.74  
 74.04  
 66.11  
 65.07  
 59.47  
 55.13  
 54.91  
 48.61  
 45.94  
 37.07  
 36.15  
 8.92  
 1.92

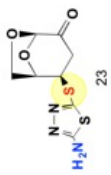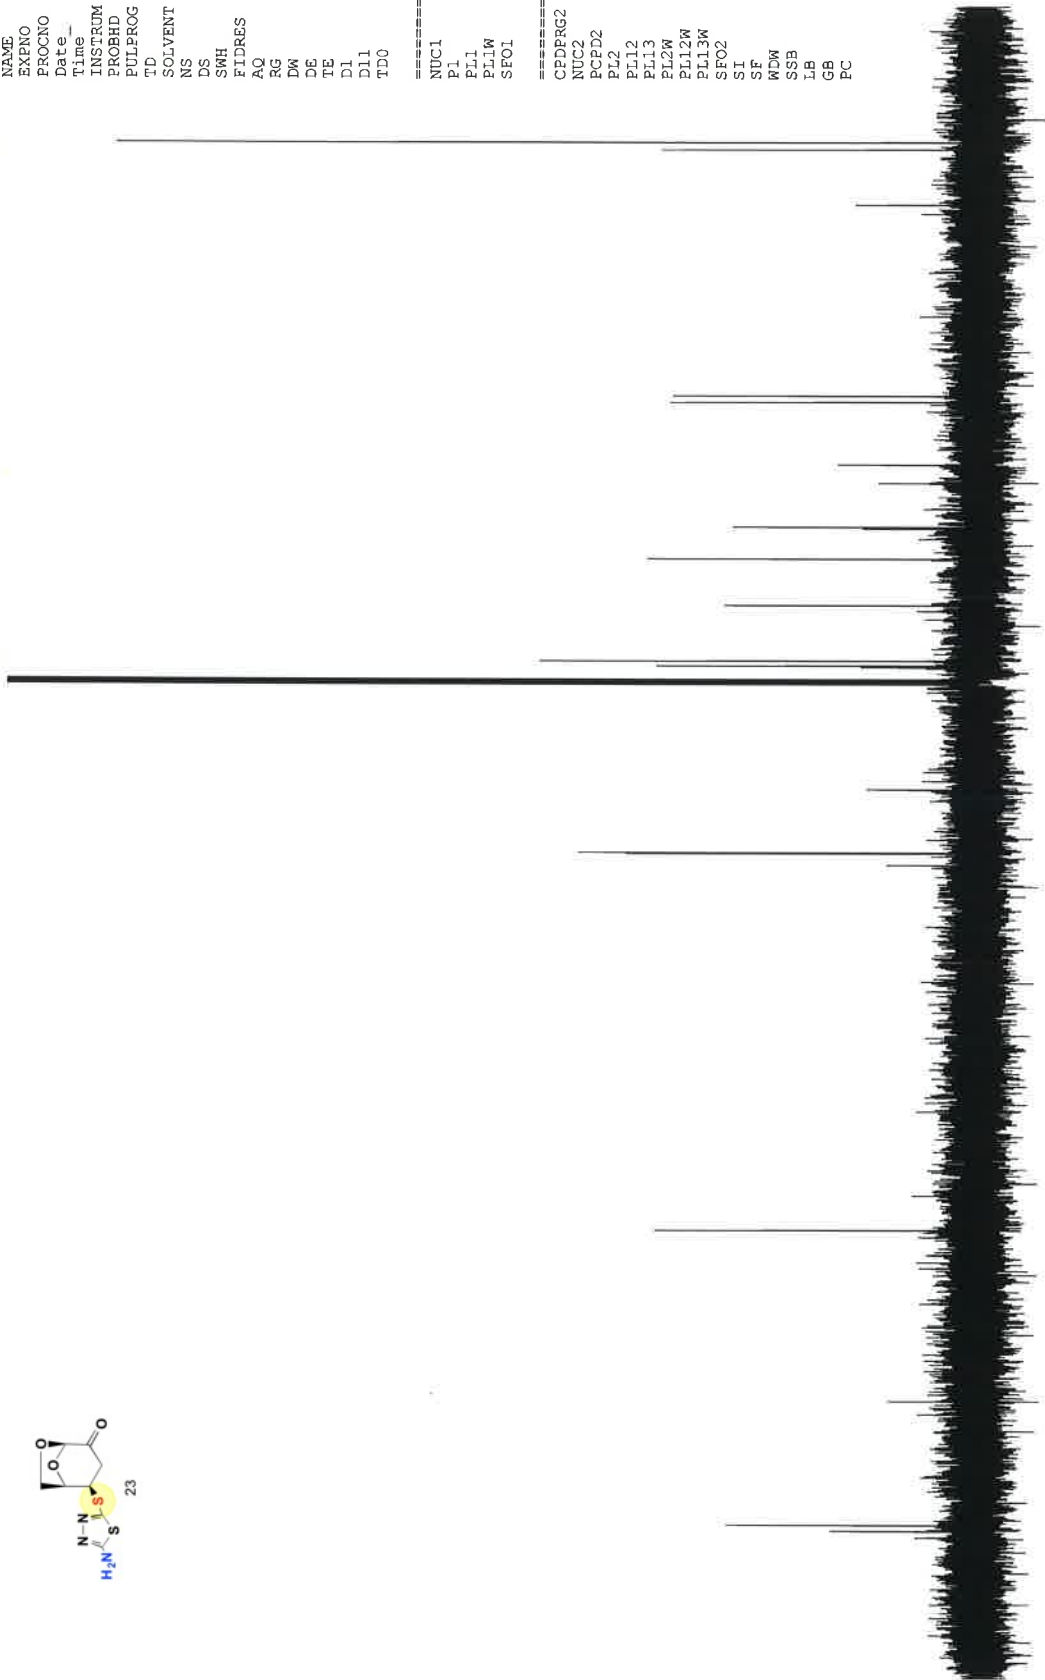

200 180 160 140 120 100 80 60 40 20 0 ppm

AM Reaction 23 22Mar17

AM\_Reaction\_23\_22Mar17

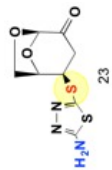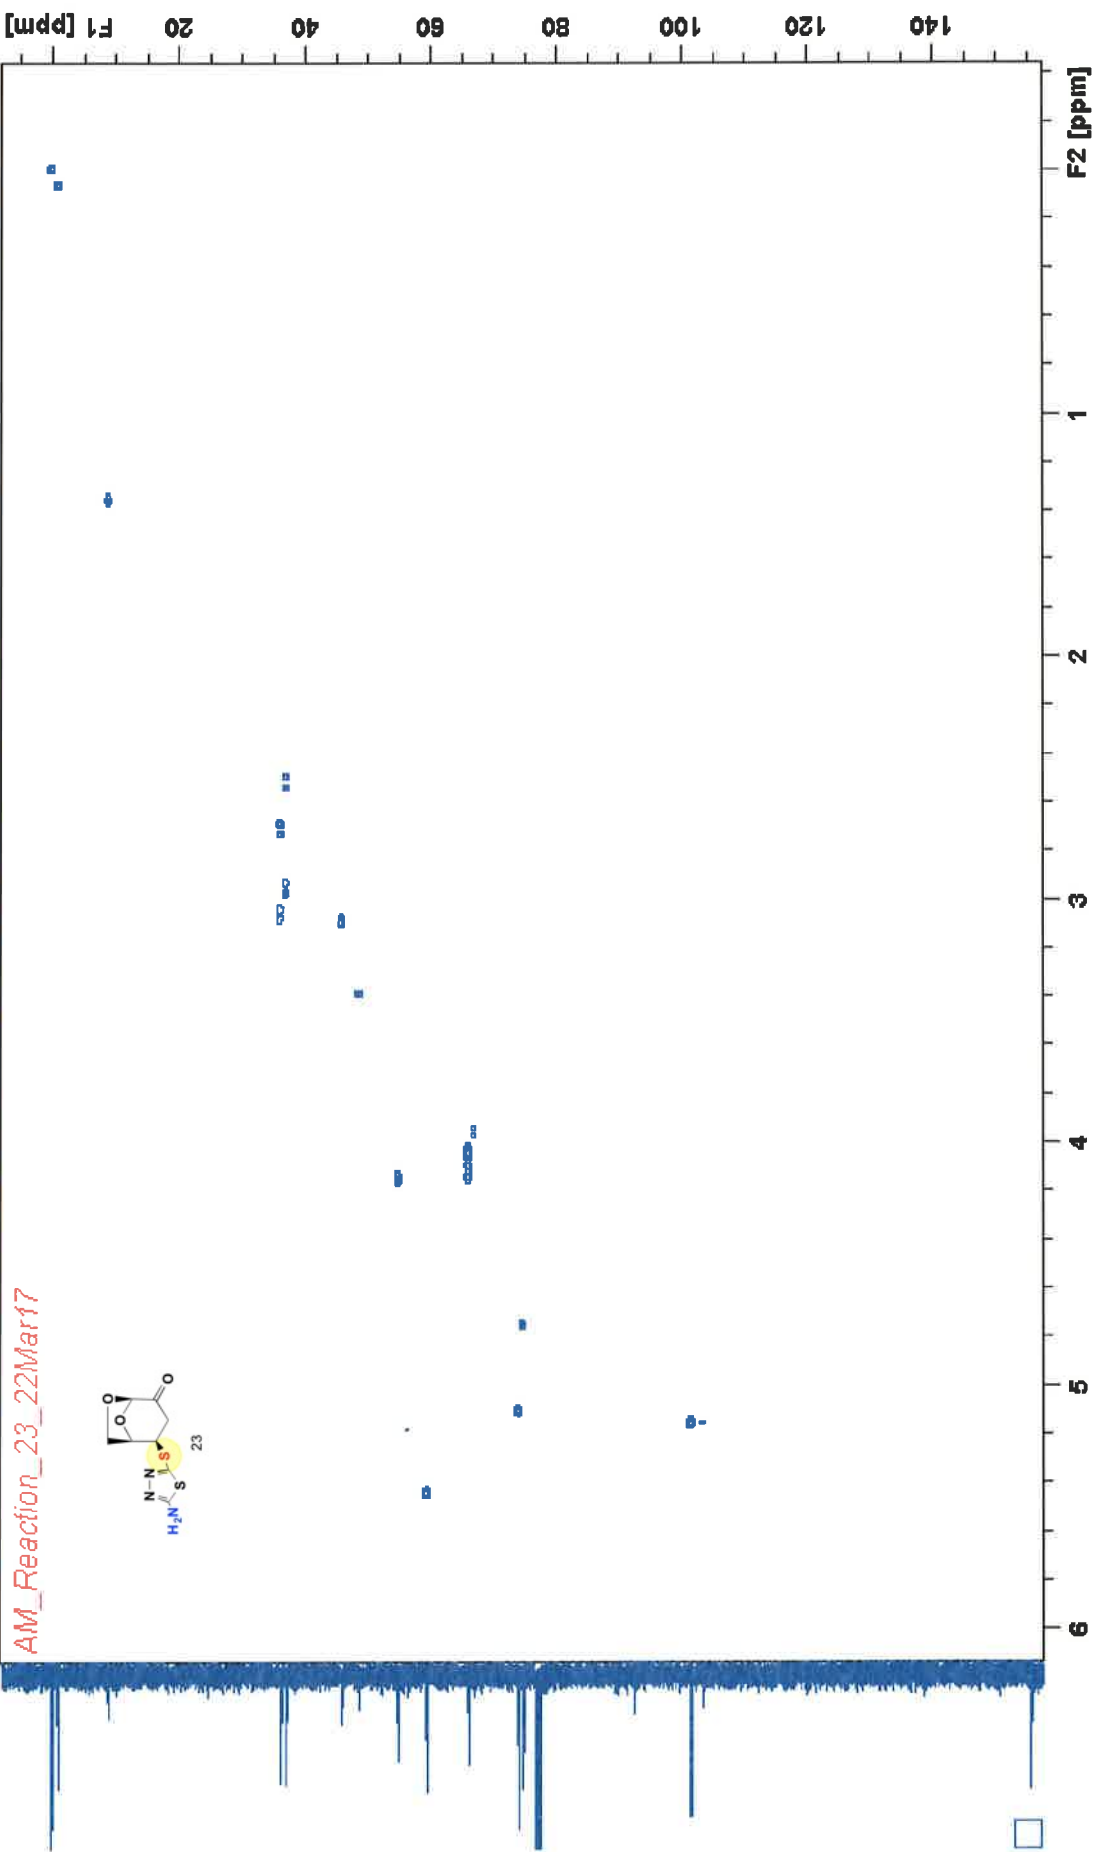

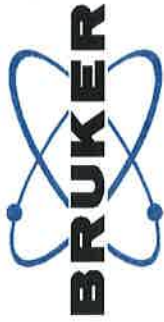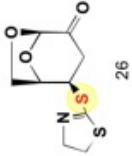

NAME AM\_reaction26\_22Mar17

EXPNO 10  
 PROCNO 1  
 Date\_ 20170322  
 Time 12.30  
 INSTRUM Spect  
 PROBHD 5 mm PABBO BB-  
 PULPROG zg30  
 TD 65536  
 SOLVENT CDCl3  
 NS 64  
 DS 2  
 SWH 8223.685 Hz  
 FIDRES 0.125483 Hz  
 AQ 3.9846387 sec  
 RG 101  
 DW 60.800 usec  
 DE 6.50 usec  
 TE 293.8 K  
 D1 1.00000000 sec  
 TDO 1

===== CHANNEL f1 =====  
 NUC1 1H  
 P1 14.50 usec  
 PL1 -1.50 dB  
 PLLW 12.52491283 W  
 SFO1 400.1324710 MHz  
 SI 32768  
 SF 400.1299981 MHz  
 WDW EM  
 SSB 0  
 LB 0.30 Hz  
 GB 0  
 PC 1.00

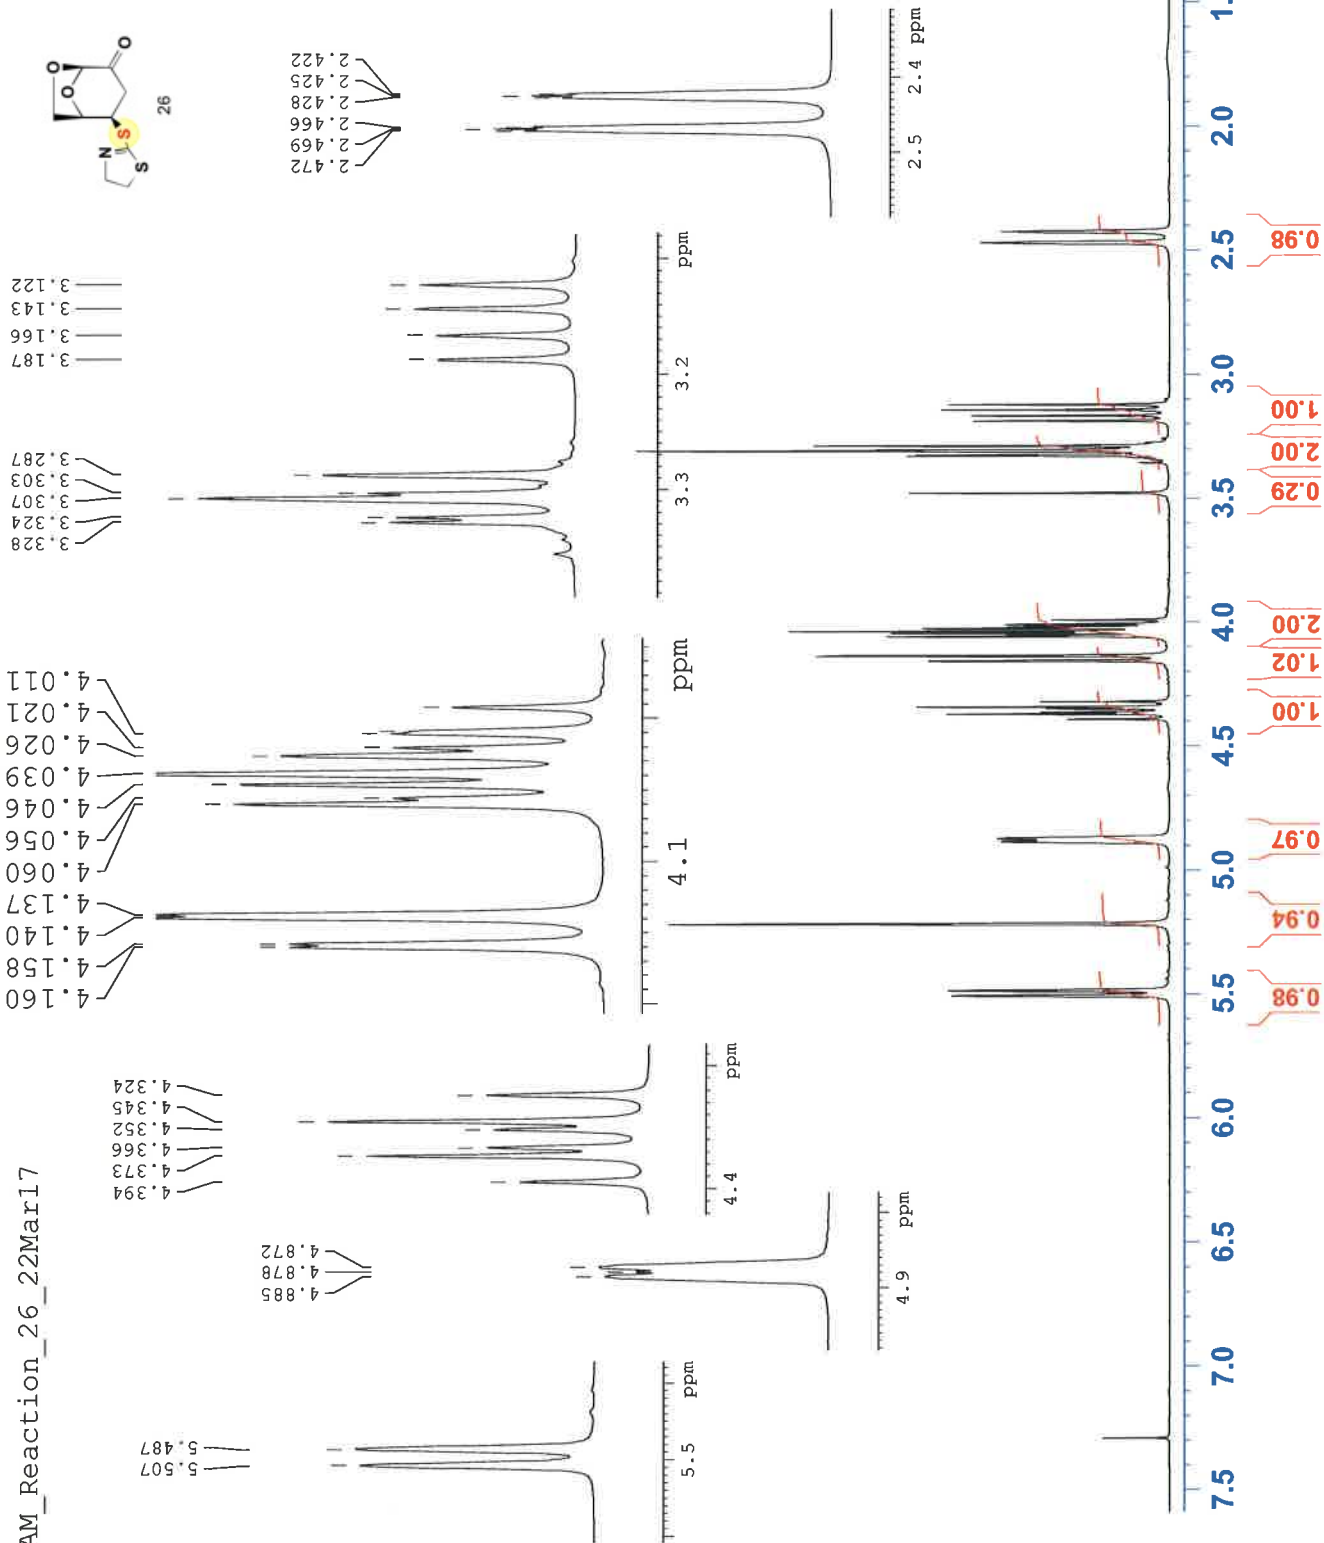

AM\_Reaction\_26\_22Mar17

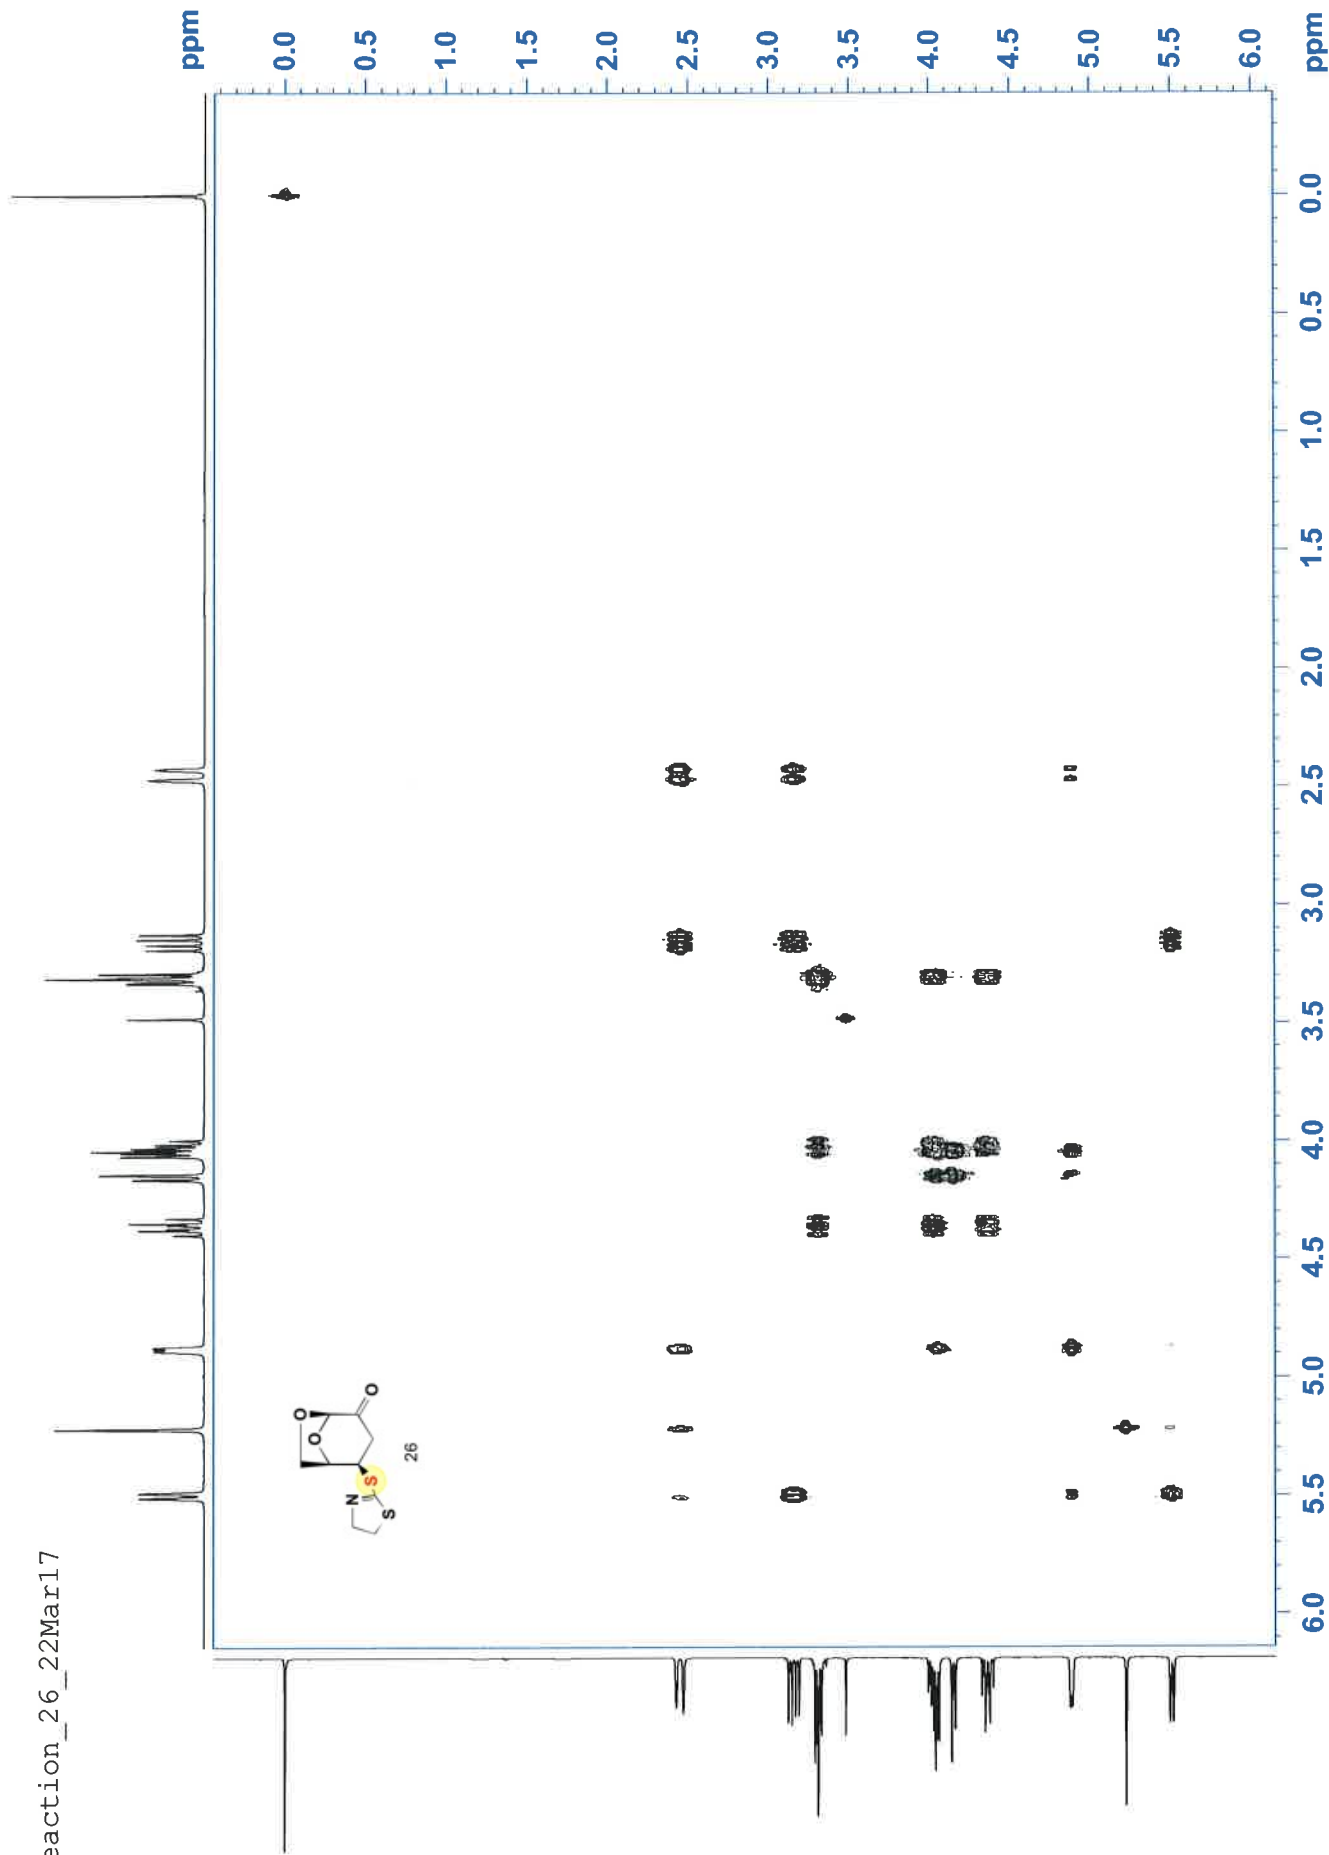

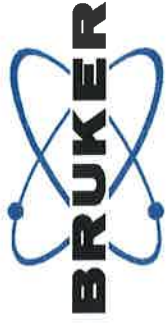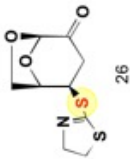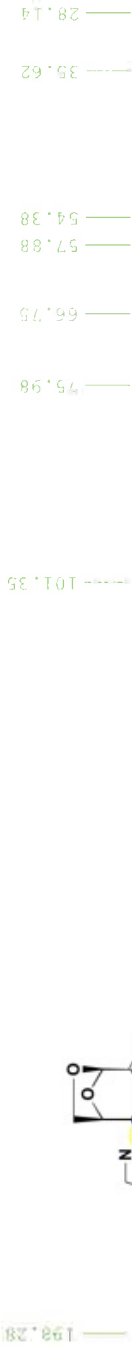

```

NAME AM_reaction26_22Mar17
EXPNO 12
PROCNO 1
Date_ 20170322
Time_ 12.51
INSTRUM spect
PROBHD 5 mm PABBO BB-
PULPROG zgpg30
TD 65536
SOLVENT CDCl3
NS 256
DS 4
SWH 24038.461 Hz
FIDRES 0.366798 Hz
AQ 1.3631988 sec
RG 203
DW 20.800 usec
DE 6.50 usec
TE 295.6 K
D1 2.00000000 sec
D11 0.03000000 sec
TD0 1

===== CHANNEL f1 =====
NUC1 13C
P1 8.80 usec
PL1 -3.00 dB
PL1W 66.65790558 W
SFO1 100.6228298 MHz

===== CHANNEL f2 =====
CPDPRG2 waltz16
NUC2 1H
PCPD2 80.00 usec
PL2 -1.50 dB
PL12 13.33 dB
PL15 13.00 dB
PL2W 12.52491283 W
PL12W 0.41188380 W
PL15W 0.44440067 W
SFO2 400.1316005 MHz
SI 32768
SF 100.6127690 MHz
WDW no
SSB 0
LB 0.00 Hz
GB 0
PC 1.40
    
```

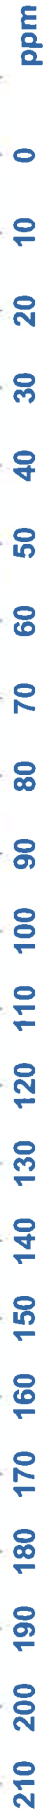



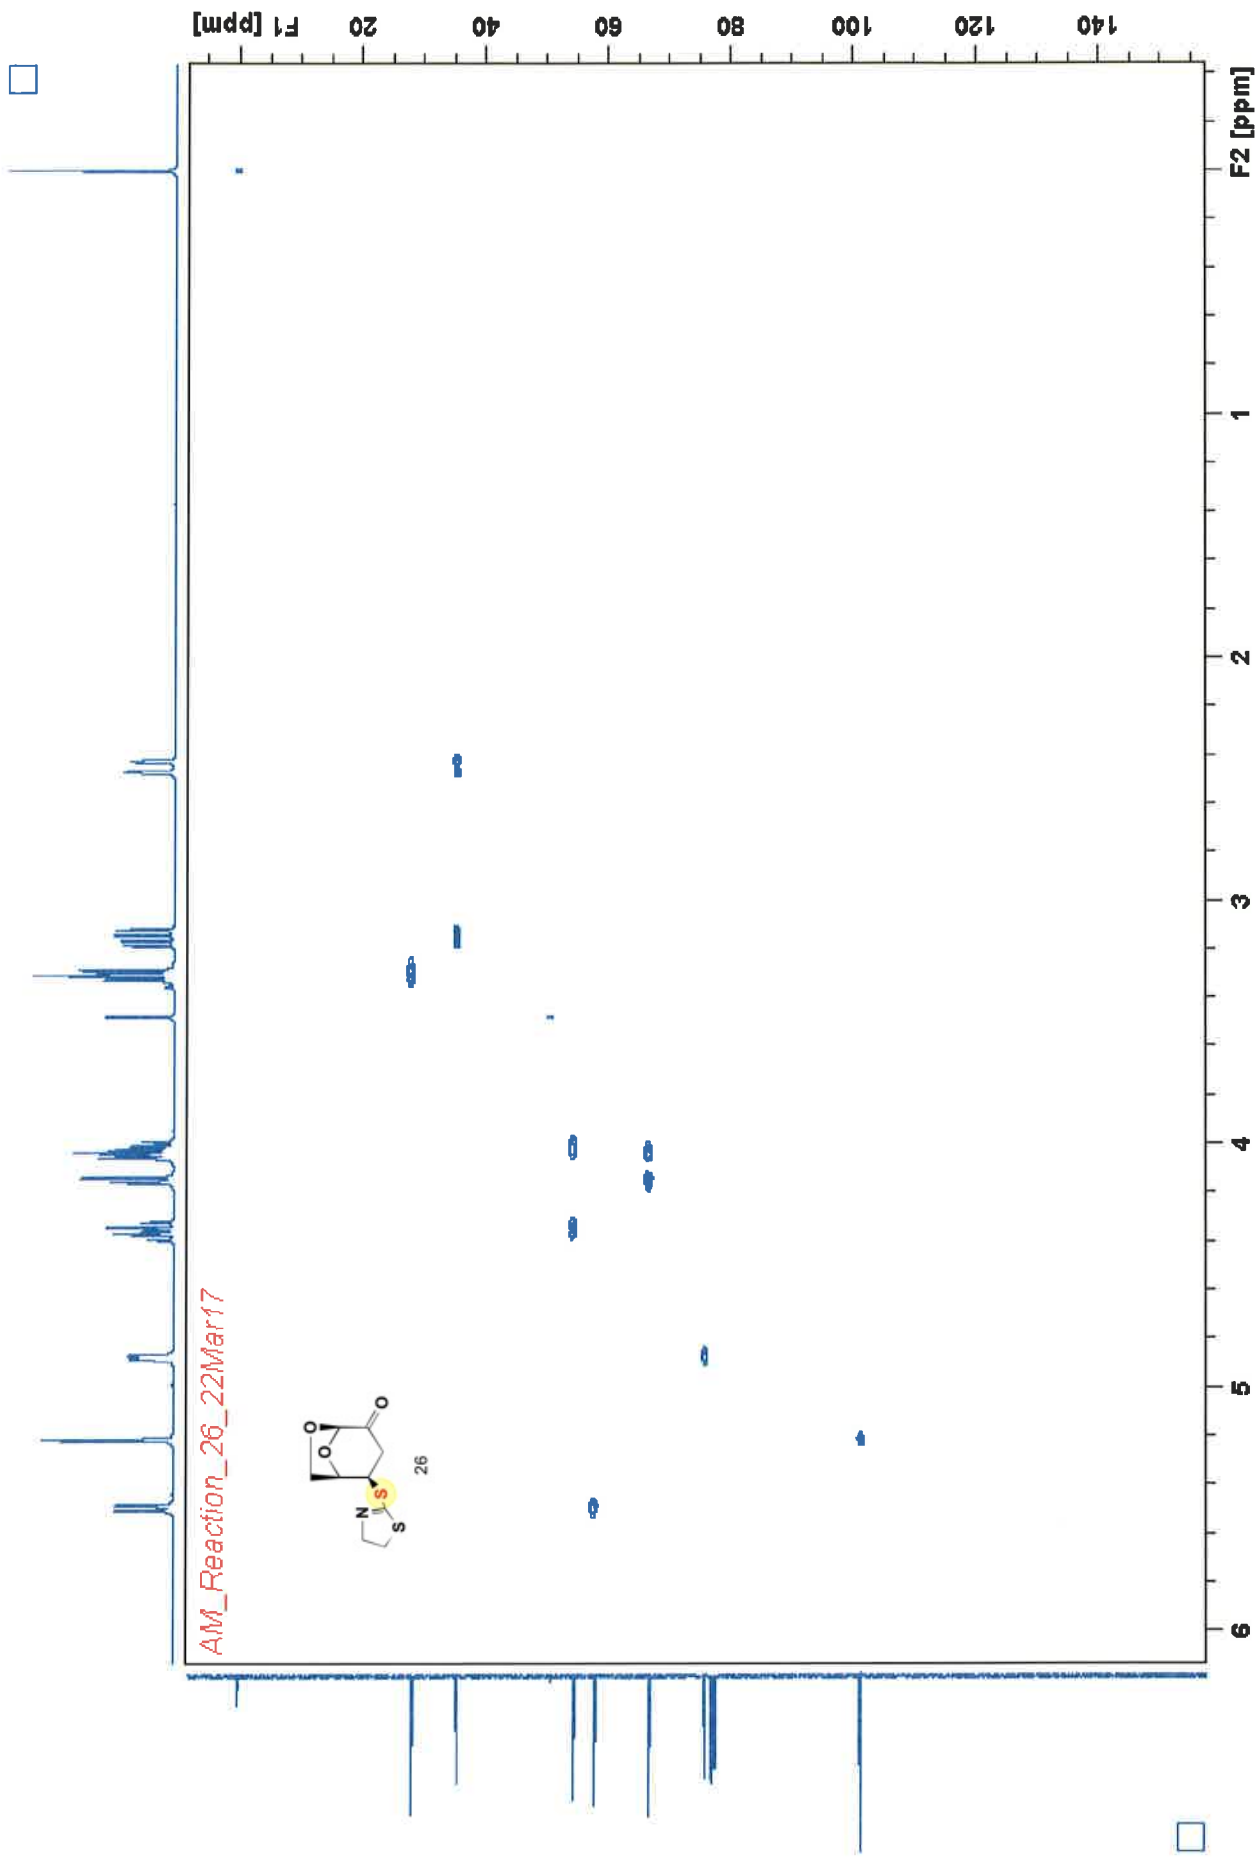

Supplement: molecules-22-00812-s001.pdf [file molecules-22-00812-s001.pdf]
